# Supplementary material for: Exploring the Effects of the Interaction of Carbon and MoS2 Catalyst on CO2 Hydrogenation to Methanol
Source: MDPI journal article supplement (doi:10.3390/ijms23095220), 2022-05-07
Supplement: s1 [file s1]

# Exploring the Effects of the Interaction of Carbon and MoS<sub>2</sub>

## Catalyst on CO<sub>2</sub> Hydrogenation to Methanol

Pingping Cui, Ruyu Sun, Linfei Xiao \*, Wei Wu \*

College of Chemistry, Chemical Engineering and Materials, Heilongjiang University,  
Heilongjiang, 150080

Email: xiaolf@hlju.edu.cn; wuwei@hlju.edu.cn

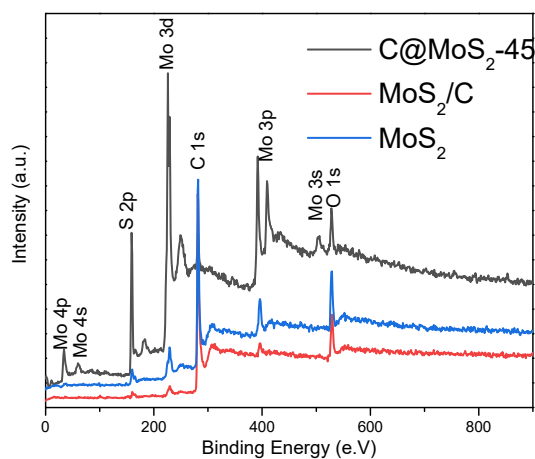

Figure S1. XPS survey spectra

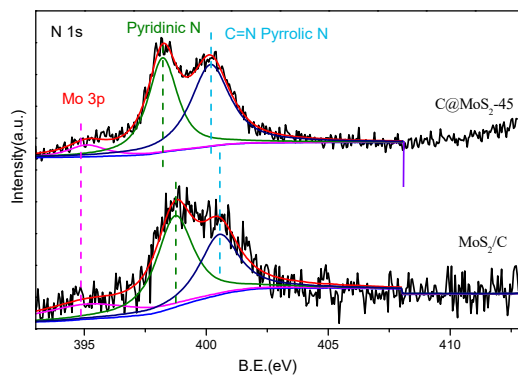

Figure S2. XPS of N1s

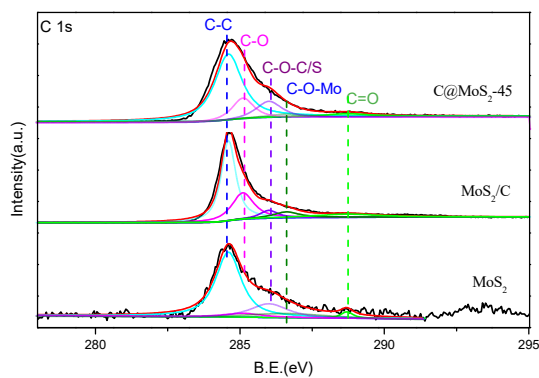

Figure S3. XPS of C1s

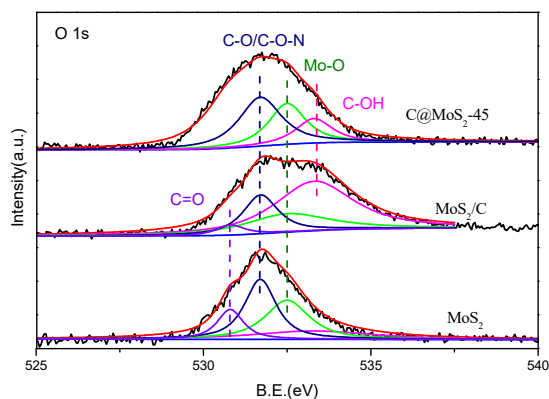

Figure S4. XPS of O1s

Table S1. Mo,S,O,N,C content on the surface of each sample

| Catalysts              | Mo (mol%) | S (mol%) | C (mol%) | O (mol%) | N (mol%) |
|------------------------|-----------|----------|----------|----------|----------|
| C@MoS <sub>2</sub> -45 | 0.58      | 3.05     | 73.58    | 10.52    | 12.28    |
| MoS <sub>2</sub> /C    | 0.27      | 0.96     | 85.38    | 8.75     | 4.64     |
| MoS <sub>2</sub>       | 17.31     | 35.33    | 28.87    | 18.4     | 0.00     |

Table S2. Qualitative analysis of Mo 3d orbital

| Catalysts              | Mo <sup>2+</sup> 3d <sub>5/2</sub> | Mo <sup>2+</sup> 3d <sub>3/2</sub> | Mo <sup>4+</sup> 3d <sub>5/2</sub> | Mo <sup>4+</sup> 3d <sub>3/2</sub> | Mo <sup>6+</sup> d <sub>5/2</sub> | Mo <sup>6+</sup> 3d <sub>3/2</sub> |
|------------------------|------------------------------------|------------------------------------|------------------------------------|------------------------------------|-----------------------------------|------------------------------------|
| C@MoS <sub>2</sub> -45 | 228.0 eV                           | 231.1 eV                           | 229.1 eV                           | 232.0 eV                           | 232.4 eV                          | 235.5 eV                           |
| MoS <sub>2</sub> /C    | -                                  | -                                  | 229.1 eV                           | 232.0 eV                           | 232.8 eV                          | 235.9 eV                           |
| MoS <sub>2</sub>       | -                                  | -                                  | 229.1 eV                           | 232.3 eV                           | -                                 | -                                  |

Table S3. Qualitative analysis of S 2s orbital

| Catalysts              | Mo-S S2p <sub>3/2</sub> | Mo-S S2p <sub>1/2</sub> | -C-S <sub>x</sub> -C- S2p <sub>3/2</sub> | C-S <sub>x</sub> -C- S2p <sub>1/2</sub> | C-S(O) <sub>x</sub> -C- S2p <sub>1/2</sub> |
|------------------------|-------------------------|-------------------------|------------------------------------------|-----------------------------------------|--------------------------------------------|
| C@MoS <sub>2</sub> -45 | 161.8 eV                | 163.2 eV                | 163.8 eV                                 | 164.8 eV                                | 168.2 eV                                   |
| MoS <sub>2</sub> /C    | 161.8 eV                | 163.2 eV                | 163.8 eV                                 | 164.8 eV                                | 168.2 eV                                   |
| MoS <sub>2</sub>       | 162.2 eV                | 163.2 eV                | -                                        | -                                       | -                                          |

Table S4. Qualitative analysis of N 1s orbital

| Catalysts              | Mo 3p    | Pyridinic N | Pyrolic N |
|------------------------|----------|-------------|-----------|
| C@MoS <sub>2</sub> -45 | 395.2 eV | 398.2 eV    | 400.2 eV  |
| MoS <sub>2</sub> /C    | 395.2 eV | 398.8 eV    | 400.5 eV  |

Table S5. Qualitative analysis of C 1s orbital

| Catalysts              | C-C   | C-O   | C-O-C/S | C-O-Mo | C=O   |
|------------------------|-------|-------|---------|--------|-------|
| C@MoS <sub>2</sub> -45 | 284.6 | 285.2 | 286.1   | 286.6  | 288.7 |
| MoS <sub>2</sub> /C    | 284.6 | 285.2 | 286.1   | 286.6  | 288.7 |
| MoS <sub>2</sub>       | 284.6 | 285.2 | 286.1   | 286.6  | 288.7 |

Table S6. Qualitative analysis of O 1s orbital

| Catalysts              | C=O      | C-O/C-O-N | Mo-O     | C-OH     |
|------------------------|----------|-----------|----------|----------|
| C@MoS <sub>2</sub> -45 | -        | 531.7 eV  | 532.5 eV | 533.4 eV |
| MoS <sub>2</sub> /C    | 530.8 eV | 531.7 eV  | 532.5 eV | 533.4 eV |
| MoS <sub>2</sub>       | 530.8 eV | 531.7 eV  | 532.5 eV | 533.4 eV |

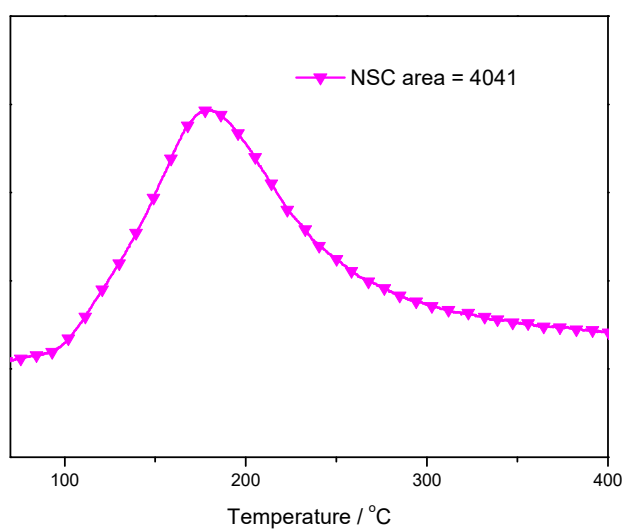Figure S5. CO<sub>2</sub>-TPD curves of NSC

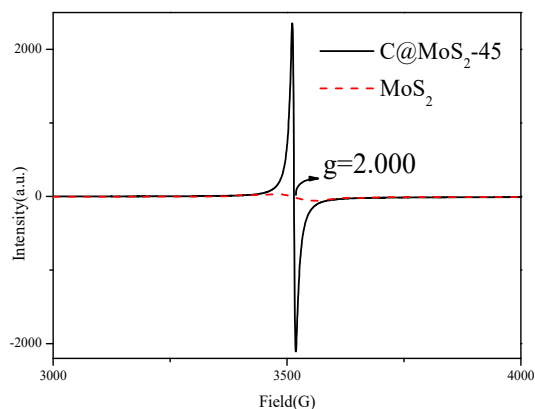

Figure S6. EPR spectrograms of C@MoS<sub>2</sub>-45, MoS<sub>2</sub>

Electron paramagnetic resonance (EPR) is a magnetic resonance technique originating from the magnetic moments of unpaired electrons and can be used to quantify the amount of unpaired electrons in a sample and to explore the structural properties of its surroundings. [70] Sulphur vacancies can trap unpaired electrons from semi-conducting sulphides and this can be detected by electron paramagnetic resonance (EPR). [71] This determines whether the catalyst contains sulphur vacancies or oxygen vacancies and identifies electrons with residual defects. [72] Quantification of signal intensities from multiple EPR experiments is shown in Figure S6, and based on the fact that EPR intensity is proportional to the concentration of sulphur vacancies, it is clear that the concentration of defect sites is higher in MoS<sub>2</sub>-45@C compared to MoS<sub>2</sub>. [73,74]
